# Supplementary material for: Reaction and subsequent transformation of anionic acetylide–carbene complexes using the Ph3PAu+ fragment
Source: Royal Society of Chemistry journal article supplement (doi:10.1039/b708915e), 2007-01-01
Supplement: b708915e.pdf [file b708915e.pdf]

**Reaction and subsequent transformation of anionic acetylide carbene complexes using the  $\text{Ph}_3\text{PAu}^+$  fragment**

Elzet Stander, Catharine Esterhuysen, Jean M. McKenzie, Stephanie Cronje and Helgard G. Raubenheimer

**Table S1** Data used to plot Figure 1 (%**2a** and %**3a** at a given time obtained from integrating the  $\text{NMe}_2$  peaks in the respective  $^1\text{H}$  NMR spectra)

| Time in minutes | % <b>2a</b> | % <b>3a</b> |
|-----------------|-------------|-------------|
| 7               | 93.315      | 6.69        |
| 17              | 86.512      | 13.49       |
| 27              | 80.131      | 19.87       |
| 37              | 74.134      | 25.87       |
| 47              | 68.582      | 31.42       |
| 57              | 63.424      | 36.58       |
| 67              | 58.743      | 41.26       |
| 77              | 54.435      | 45.57       |
| 87              | 50.638      | 49.36       |
| 97              | 47.243      | 52.76       |
| 107             | 44.246      | 55.75       |
| 117             | 41.578      | 58.42       |
| 127             | 39.293      | 60.71       |
| 137             | 37.261      | 62.74       |
| 147             | 35.455      | 64.54       |
| 157             | 33.826      | 66.17       |
| 167             | 32.489      | 67.51       |
| 177             | 31.281      | 68.72       |
| 187             | 30.207      | 69.79       |
| 197             | 29.366      | 70.63       |
| 207             | 28.521      | 71.48       |
| 217             | 27.831      | 72.17       |
| 227             | 27.224      | 72.78       |
| 237             | 26.665      | 73.33       |
| 247             | 26.181      | 73.82       |
| 257             | 25.797      | 74.20       |
| 267             | 25.479      | 74.52       |
| 277             | 25.132      | 74.87       |
| 287             | 24.851      | 75.15       |
| 297             | 24.685      | 75.31       |
| 307             | 24.490      | 75.51       |
